# Supplementary figures and images for: The Impact of a Cypovirus on Parental and Filial Generations of Lymantria dispar L.
Source: MDPI journal article supplement (doi:10.3390/insects14120917), 2023-11-30

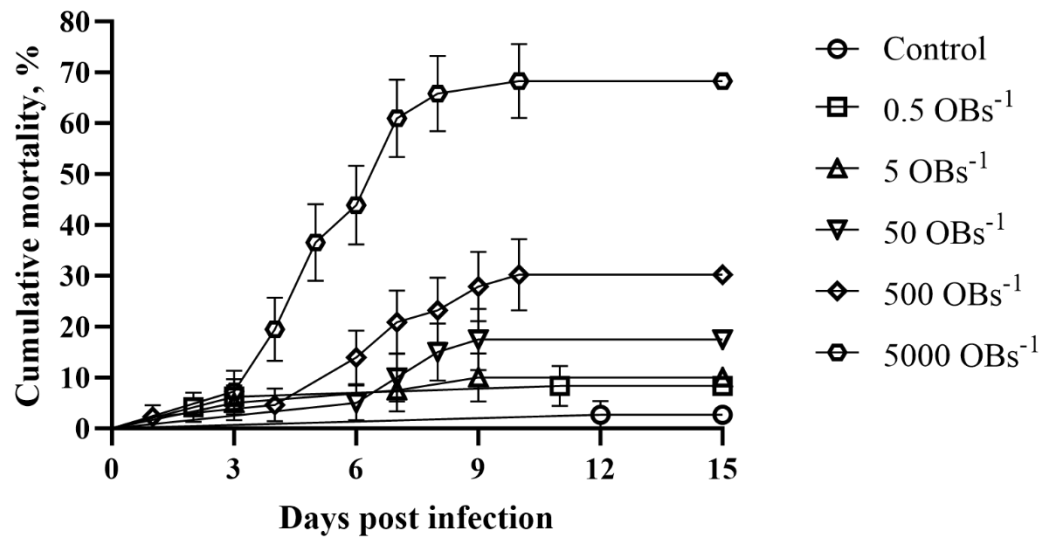

Figure S1. Mortality dynamics of parental *L. dispar* larvae after DsCPV1 infection

Supplement: s1 [file s1]
